# Supplementary material for: Light harvesting enhancement upon incorporating alloy structured CdSeXTe1−X quantum dots in DPP:PC61BM bulk heterojunction solar cells
Source: Royal Society of Chemistry journal article supplement (doi:10.1039/c6tc04308a), 2016-12-09
Supplement: c6tc04308a1.pdf [file c6tc04308a1.pdf]

## Electronic Supplementary Information for:

### Light harvesting enhancement upon incorporating alloy structured CdSe<sub>x</sub>Te<sub>1-x</sub> quantum dots in DPP:PC<sub>61</sub>BM bulk heterojunction solar cell

*Rezvan Soltani<sup>a\*</sup>, Ali Asghar Katbab<sup>a\*</sup>, Kerstin Schaumberger<sup>b</sup>, Nicola Gasparini<sup>b</sup>, Christoph J. Brabec<sup>b,c</sup>, Stefanie  
Rechberger<sup>d</sup>, Erdmann Spiecker<sup>d</sup>, Antoni Gimeno Alabau<sup>e</sup>, Andres Ruland<sup>f</sup>, Avishek Saha<sup>g</sup>, Dirk M. Guldi<sup>g</sup>, Vito  
Sgobba<sup>c\*</sup> and Tayebeh Ameri<sup>b\*</sup>*

<sup>a</sup> Department of Polymer Engineering, Amirkabir University of technology, Tehran, 1591634311, Iran

<sup>b</sup> Materials for Electronics and Energy Technology (i-MEET), Friedrich-Alexander-University Erlangen-Nuremberg, Martensstraße 7, 91058 Erlangen, Germany

<sup>c</sup> ZAE - Bayerisches Zentrum für Angewandte Energieforschung e.V., Bavarian Center for Applied Energy Research, Haberstr. 2a, 91058 Erlangen

<sup>d</sup> Institute of Micro- and Nanostructure Research & Center for Nanoanalysis and Electron Microscopy (CENEM), Friedrich-Alexander-University Erlangen-Nuremberg, Cauerstrasse 6, 91058 Erlangen, Germany

<sup>e</sup> C/Teniente Mut n°58 p2, CP 46610 Guadassuar, Valencia, Spain

<sup>f</sup> Intelligent Polymer Research Institute (IPRI), Innovation Campus, Squires Way, North Wollongong, NSW, 2500, Australia

<sup>g</sup> Department of Chemistry and Pharmacy and Interdisciplinary Center for Molecular Materials (ICMM), Friedrich-Alexander-Universität Erlangen-Nürnberg, Egerlandstraße 3, 91058 Erlangen, Germany.

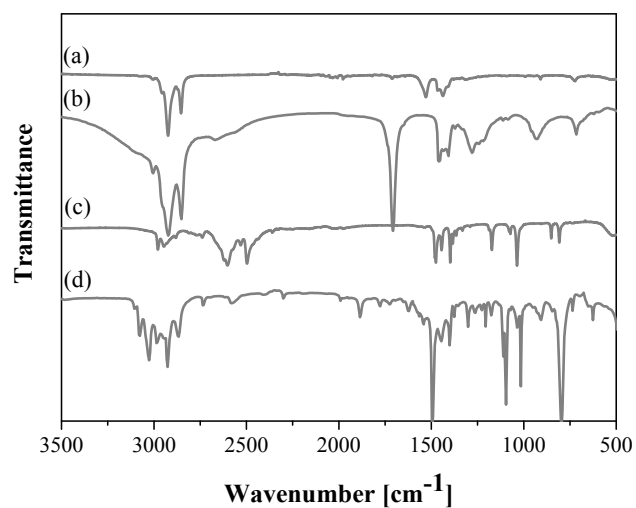

Figure S1. FT-IR spectra of (a) oleate capped CdSe<sub>x</sub>Te<sub>1-x</sub> QDs (before ligand exchange), (b) p-methylthiolate capped CdSe<sub>x</sub>Te<sub>1-x</sub> QDs (after ligand exchange), (c) oleic acid, and (d) p-methylthiophenole.

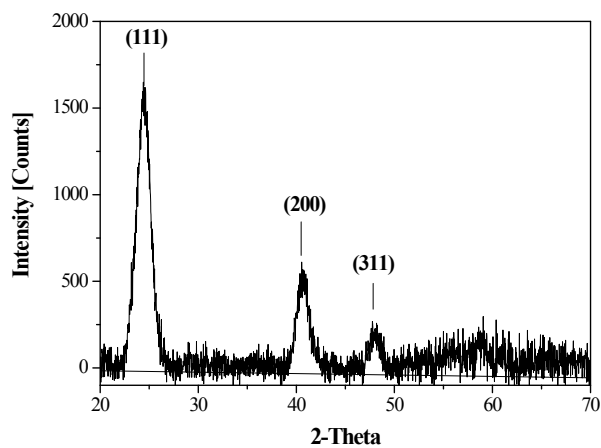

Figure S2. Powder x-ray diffractogram of CdSe<sub>x</sub>Te<sub>1-x</sub> QDs demonstrating their cubic zinc blende crystallinity.

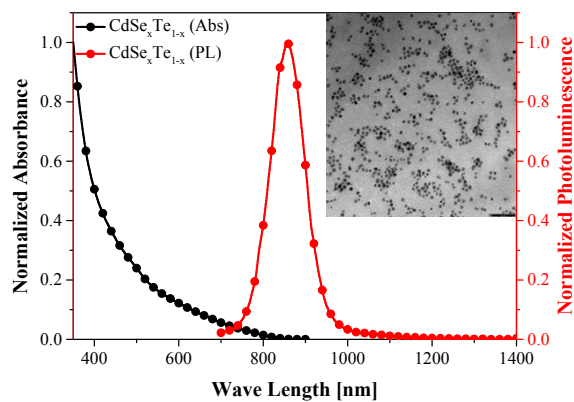

Figure S3. UV-Vis absorption and PL spectra of methylthiophenol-capped  $\text{CdSe}_x\text{Te}_{1-x}$  nanoparticles. (Inset: TEM image of nanoparticles (the scale bar is 50 nm)).

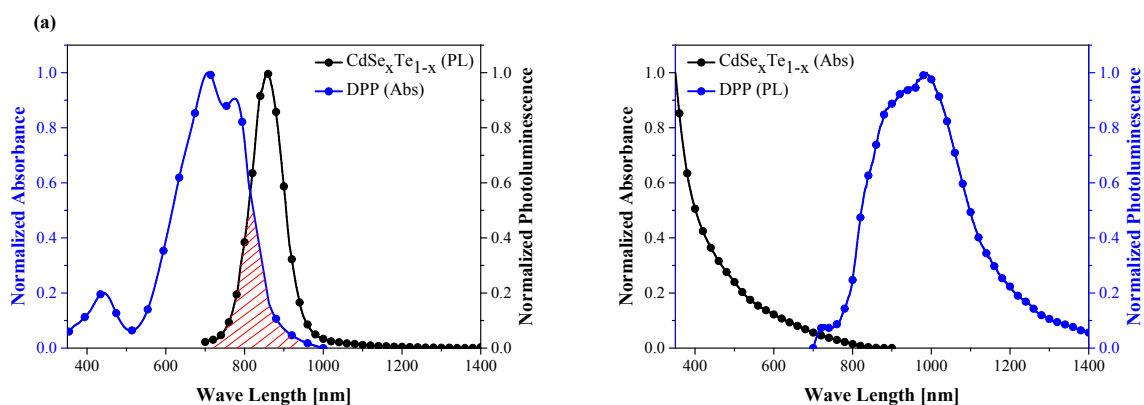

Figure S4. (a) UV-Vis absorption and PL spectra of DPP and  $\text{CdSe}_x\text{Te}_{1-x}$  NPs respectively, (b) UV-Vis absorption and PL spectra of  $\text{CdSe}_x\text{Te}_{1-x}$  NPs and DPP respectively.

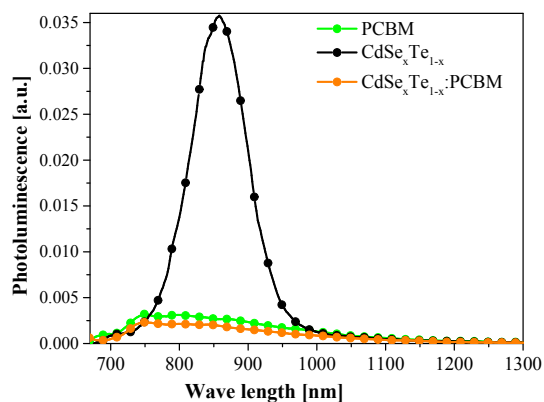

Figure S5. Photoluminescence spectra of PCBM, CdSe<sub>x</sub>Te<sub>1-x</sub> and CdSe<sub>x</sub>Te<sub>1-x</sub>:PCBM

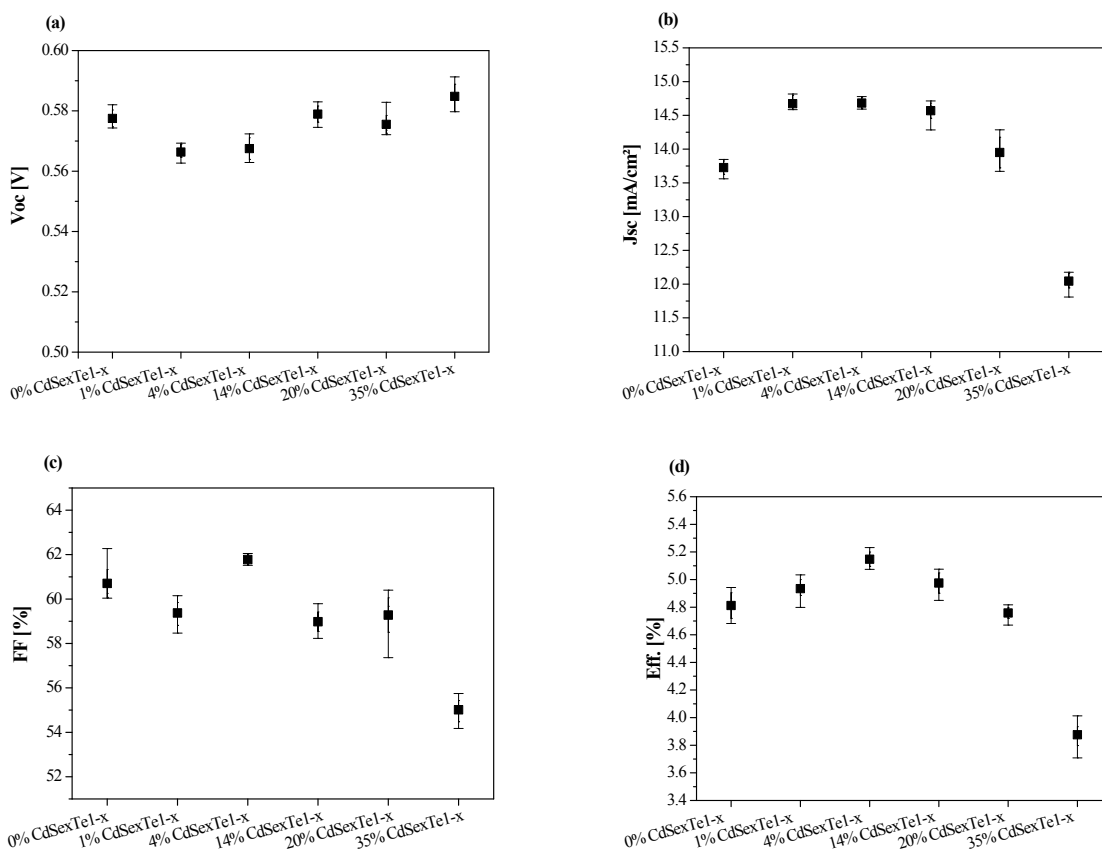

Figure S6. Box diagrams displaying (a) V<sub>oc</sub>, (b) J<sub>sc</sub>, (c) FF and (d) PCE of 6 cells containing different CdSe<sub>x</sub>Te<sub>1-x</sub> content.

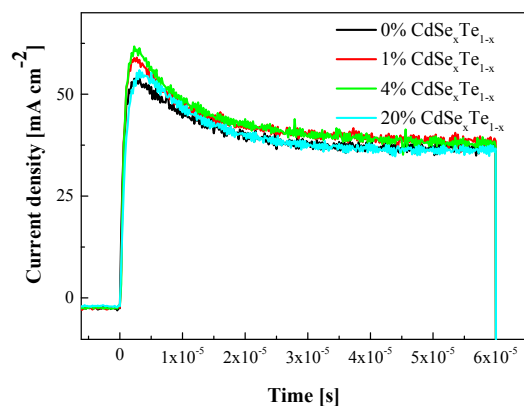

Figure S7. Time dependent photo-CELIV traces of hybrid solar cells with different  $\text{CdSe}_x\text{Te}_{1-x}$  concentrations.

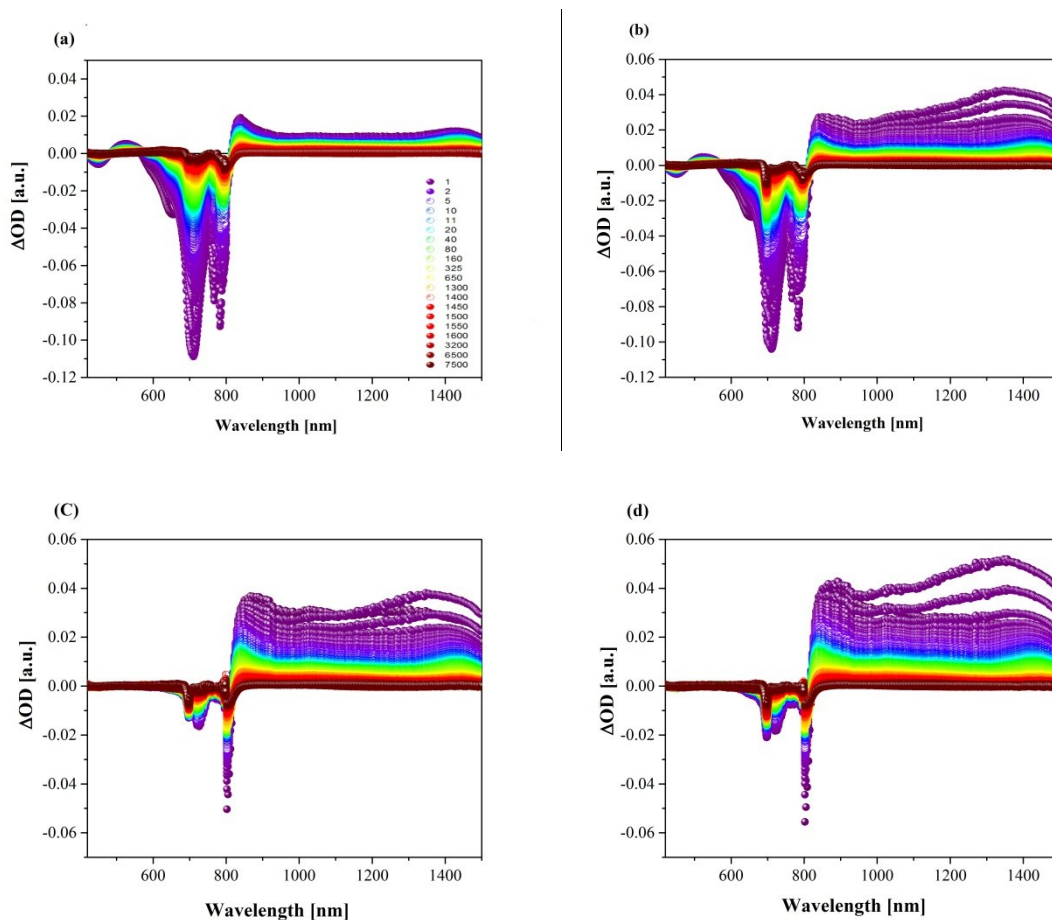

Figure S8. Differential absorption spectra upon excitation at 695 nm (100 nJ) of ternary film containing (a) 1 wt.%  $\text{CdSe}_x\text{Te}_{1-x}$ , (b) 4 wt.%  $\text{CdSe}_x\text{Te}_{1-x}$ , (c) 14 wt.%  $\text{CdSe}_x\text{Te}_{1-x}$ , and (d) 20 wt.%  $\text{CdSe}_x\text{Te}_{1-x}$ . The numbers reported in the legend correspond to the time delays in ps.
